# Supplementary material
Source: Research Square preprint supplement (doi:10.21203/rs.3.rs-9344661/v1)
Supplement: Supplementary file 1 [file 7c00c626119c4823f4ea6c92.docx]

**Supplementary data**

Supplementary ***Table 1:*** Normalized counts of contigs, MAGs, plasmids, and viral reads per one million reads. The conventional orchards in both Israeli and USA samples showed higher normalized contig and MAG counts. The organic samples in Israel exhibited substantially lower MAG and plasmid-normalized values. Viruses were almost absent, detected only in USA_Conv1_2 (0.036 per million reads). Total normalized counts per million reads were 315.987 in contigs, 151.05 in MAGs, 4.913 in plasmids, and 0.036 in viral reads.

| **Normalized per 1,000,000 reads** | | | | | |
| --- | --- | --- | --- | --- | --- |
| **Sample** | **Reads** | **Contigs** | **MAGs** | **Plasmids** | **Viruses** |
| ISR_Conv1_1 | 42707904 | 14.658 | 10.326 | 0.609 | 0 |
| ISR_Conv1_2 | 40902048 | 15.941 | 12.713 | 0.611 | 0 |
| ISR_Conv1_3 | 50833722 | 26.498 | 17.508 | 0.61 | 0 |
| ISR_Org_1 | 39696090 | 10.278 | 5.366 | 0.176 | 0 |
| ISR_Org_2 | 45358058 | 2.866 | 1.433 | 0 | 0 |
| ISR_Org_3 | 46283472 | 2.269 | 0.043 | 0 | 0 |
| USA_Conv1_1 | 41355166 | 26.333 | 11.534 | 0.387 | 0 |
| USA_Conv1_2 | 55639904 | 42.182 | 17.775 | 0.288 | 0.036 |
| USA_Conv1_3 | 45276808 | 53.67 | 14.29 | 0.574 | 0 |
| USA_Conv2_1 | 10275366 | 44.67 | 21.216 | 0.779 | 0 |
| USA_Conv2_2 | 9531878 | 40.286 | 18.255 | 0.629 | 0 |
| USA_Conv2_3 | 43949732 | 36.337 | 20.592 | 0.25 | 0 |
| **Total_ARGs** |  | **315.987** | **151.05** | **4.913** | **0.036** |

Supplementary ***Table 2:*** PERMANOVA results comparing bacteria, phage, and plasmid composition. The results showed that geographical region explained the largest proportion of variation in microbial composition (R² ≈ 0.42 - 0.50, p ≤ 0.001). Management had a significant but smaller effect across the domains (R² ≈ 0.27–0.31, p ≤ 0.003). Pairwise PERMANOVA analyses showed that regional contrasts between Israeli conventional orchards and USA conventional orchards explained 60 - 80% of the variation across bacteria (R² = 0.58 - 0.77, p = 0.10), phages (R² = 0.77 - 0.79, p = 0.10), and plasmids (R² = 0.73 - 0.78, p = 0.10). However, when USA conventional orchards were pooled, the contrasts were statistically significant (p = 0.003 - 0.006).

| **Domain** | **Contrast** | **R2** | **F** | **Pr(>F)** |
| --- | --- | --- | --- | --- |
| Bacteria | Region (ISR+USA) | 0.424989 | 11.50303 | 0.001 |
| Bacteria | Management (ISR+USA) | 0.279444 | 3.781812 | 0.003 |
| Bacteria | ISR _Conv vs USA_Conv1 | 0.582931 | 5.590745 | 0.1 |
| Bacteria | ISR_Conv vs USA_Conv2 | 0.765093 | 13.02801 | 0.1 |
| Bacteria | ISR_Conv vs USA_Conv_pooled | 0.659578 | 5.812583 | 0.004 |
| Bacteria | ISR_Conv vs ISR_Org | 0.644174 | 7.241448 | 0.1 |
| Bacteria | ISR_Org vs USA_Conv1 | 0.519392 | 4.322782 | 0.1 |
| Bacteria | ISR_Org vs USA_Conv2 | 0.791325 | 15.16859 | 0.1 |
| Bacteria | ISR_Org vs USA_Conv_pooled | 0.610823 | 4.708573 | 0.003 |
| Phage | Region (ISR+USA) | 0.441250 | 16.90225 | 0.0001 |
| Phage | Management (ISR+USA) | 0.311122 | 5.025654 | 0.0017 |
| Phage | ISR_Conv vs USA_Conv1 | 0.789487 | 15.00118 | 0.1 |
| Phage | ISR_Conv vs USA_Conv2 | 0.766155 | 13.10532 | 0.1 |
| Phage | ISR_Conv vs USA_Conv_pooled | 0.766056 | 9.823589 | 0.006 |
| Phage | ISR_Conv vs ISR_Org | 0.545041 | 4.791997 | 0.1 |
| Phage | ISR_Org vs USA_Conv1 | 0.6627 | 7.858872 | 0.1 |
| Phage | ISR_Org vs USA_Conv2 | 0.573112 | 5.370149 | 0.1 |
| Phage | ISR_Org vs USA_Conv_pooled | 0.662871 | 5.898675 | 0.003 |
| Plasmid | Region (ISR+USA) | 0.496314 | 16.90225 | 0.0001 |
| Plasmid | Management (ISR+USA) | 0.268774 | 4.576635 | 0.0042 |
| Plasmid | ISR_Conv vs USA_Conv1 | 0.776154 | 13.86941 | 0.1 |
| Plasmid | ISR_Conv vs USA_Conv2 | 0.730305 | 10.83158 | 0.1 |
| Plasmid | ISR_Conv vs USA_Conv_pooled | 0.767731 | 9.916067 | 0.004 |
| Plasmid | ISR_Conv vs ISR_Org | 0.559684 | 5.084388 | 0.1 |
| Plasmid | ISR_Org vs USA_Conv1 | 0.733363 | 11.00165 | 0.1 |
| Plasmid | ISR_Org vs USA_Conv2 | 0.670147 | 8.126623 | 0.1 |
| Plasmid | ISR_Org vs USA_Conv_pooled | 0.724762 | 7.899658 | 0.003 |

Supplementary ***Table 3:*** Pairwise comparisons (Shannon diversity) of bacteria, phage, and plasmid across management practices. The p-values were obtained using Wilcoxon tests; significant differences (p < 0.05).

| **Domain** | **Contrast** | **N1** | **N2** | **wilcox_p** |
| --- | --- | --- | --- | --- |
| **Bacteria** | ISR_Conv_vs_USA_Conv1 | 3 | 3 | 0.512691 |
| **Bacteria** | ISR_Conv_vs_USA_Conv2 | 3 | 3 | 0.049535 |
| **Bacteria** | ISR_Conv_vs_USA_Conventional | 3 | 6 | 0.121335 |
| **Bacteria** | ISR_Conv_vs_ISR_Org | 3 | 3 | 0.049535 |
| **Bacteria** | ISR_Org_vs_USA_Conv1 | 3 | 3 | 0.827259 |
| **Bacteria** | ISR_Org_vs_USA_Conv2 | 3 | 3 | 0.827259 |
| **Bacteria** | ISR_Org_vs_USA_Conventional | 3 | 6 | 0.796253 |
| **Phage** | ISR_Conv_vs_USA_Conv1 | 3 | 3 | 0.827259 |
| **Phage** | ISR_Conv_vs_USA_Conv2 | 3 | 3 | 0.827259 |
| **Phage** | ISR_Conv_vs_USA_Conventional | 3 | 6 | 0.796253 |
| **Phage** | ISR_Conv_vs_ISR_Org | 3 | 3 | 0.275234 |
| **Phage** | ISR_Org_vs_USA_Conv1 | 3 | 3 | 0.827259 |
| **Phage** | ISR_Org_vs_USA_Conv2 | 3 | 3 | 0.512691 |
| **Phage** | ISR_Org_vs_USA_Conventional | 3 | 6 | 0.605577 |
| **Plasmid** | ISR_Conv_vs_USA_Conv1 | 3 | 3 | 0.049535 |
| **Plasmid** | ISR_Conv_vs_USA_Conv2 | 3 | 3 | 0.049535 |
| **Plasmid** | ISR_Conv_vs_USA_Conventional | 3 | 6 | 0.020137 |
| **Plasmid** | ISR_Conv_vs_ISR_Org | 3 | 3 | 0.275234 |
| **Plasmid** | ISR_Org_vs_USA_Conv1 | 3 | 3 | 0.049535 |
| **Plasmid** | ISR_Org_vs_USA_Conv2 | 3 | 3 | 0.049535 |
| **Plasmid** | ISR_Org_vs_USA_Conventional | 3 | 6 | 0.020137 |

Supplementary ***Table 4:*** Pairwise comparisons of ARG Shannon diversity across different management practices. The Wilcoxon rank-sum test was used for statistical comparisons significant differences (p < 0.05).

| **Metric** | **Contrast** | **N1** | **N2** | **wilcox_p** |
| --- | --- | --- | --- | --- |
| Shannon | ISR_Conv_vs_USA_Conv1 | 3 | 3 | 0.049534613 |
| Shannon | ISR_Conv_vs_USA_Conv2 | 3 | 3 | 0.51269076 |
| Shannon | ISR_Conv_vs_USA_Conventional | 3 | 6 | 0.438578026 |
| Shannon | ISR_Conv_vs_ISR_Org | 3 | 3 | 0.121183273 |
| Shannon | ISR_Org_vs_USA_Conv1 | 3 | 3 | 0.046301595 |
| Shannon | ISR_Org_vs_USA_Conv2 | 3 | 3 | 0.268285884 |
| Shannon | ISR_Org_vs_USA_Conventional | 3 | 6 | 0.069528454 |


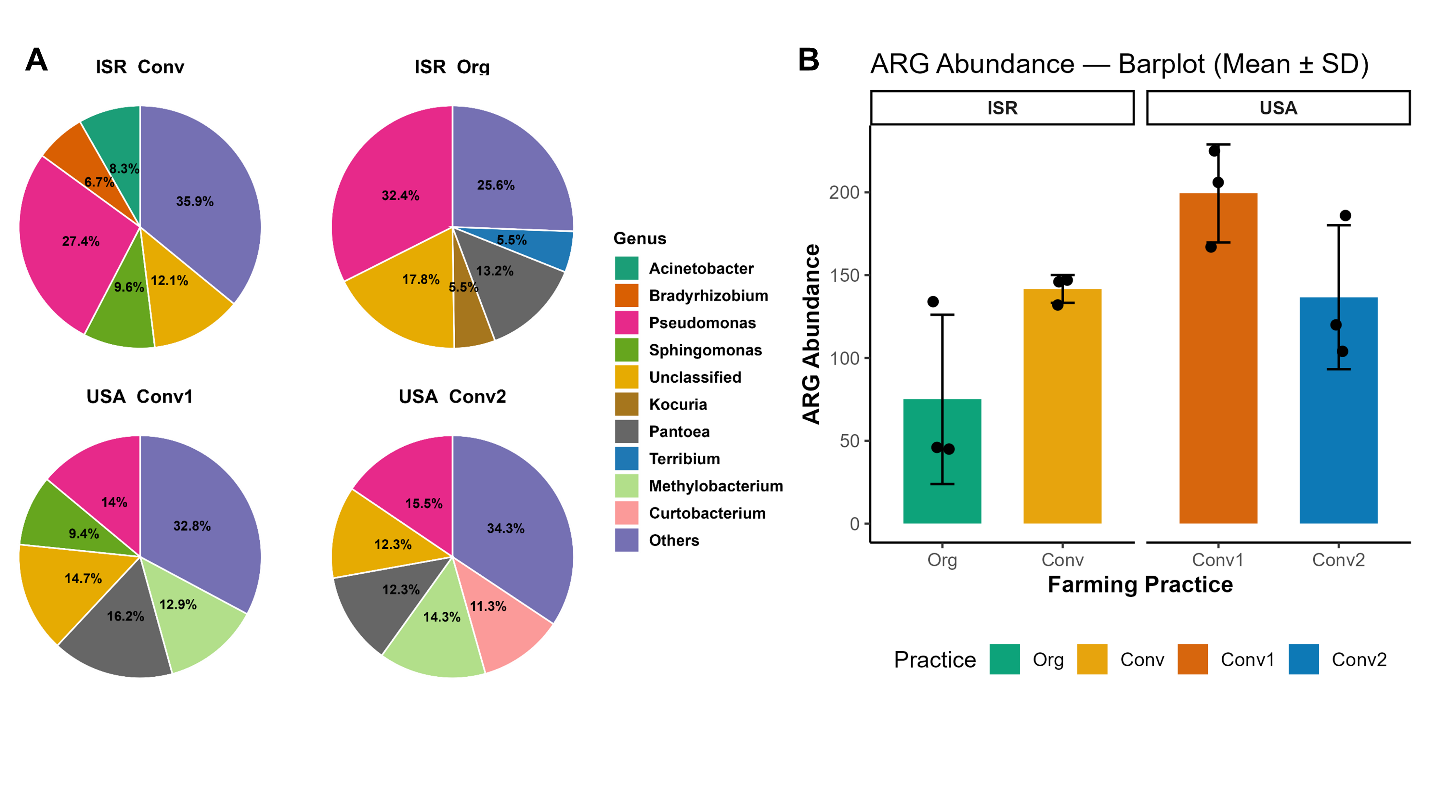


Supplementary ***Figure 1:*** ARG hosts and abundance across the management practices. (**A**) Top 5 Genera carrying ARGs. Among these, *Pseudomonas* emerged as the most dominant genus, accounting for 14 - 32.4% of the microbes carrying ARGs. Other frequently detected genera included *Pantoea*, *Sphingomonas* and *Methylobacterium* each contributing to 5 - 17% depending on the management systems. (**B**) ARG abundance, in Israel-organic orchards had a low mean of ~75 with larger spread than conventional (with mean ~145). In the USA, ARG abundance was higher in conventional_1 (with mean ~200) than conventional_2 (mean ~135) but with moderate variability.


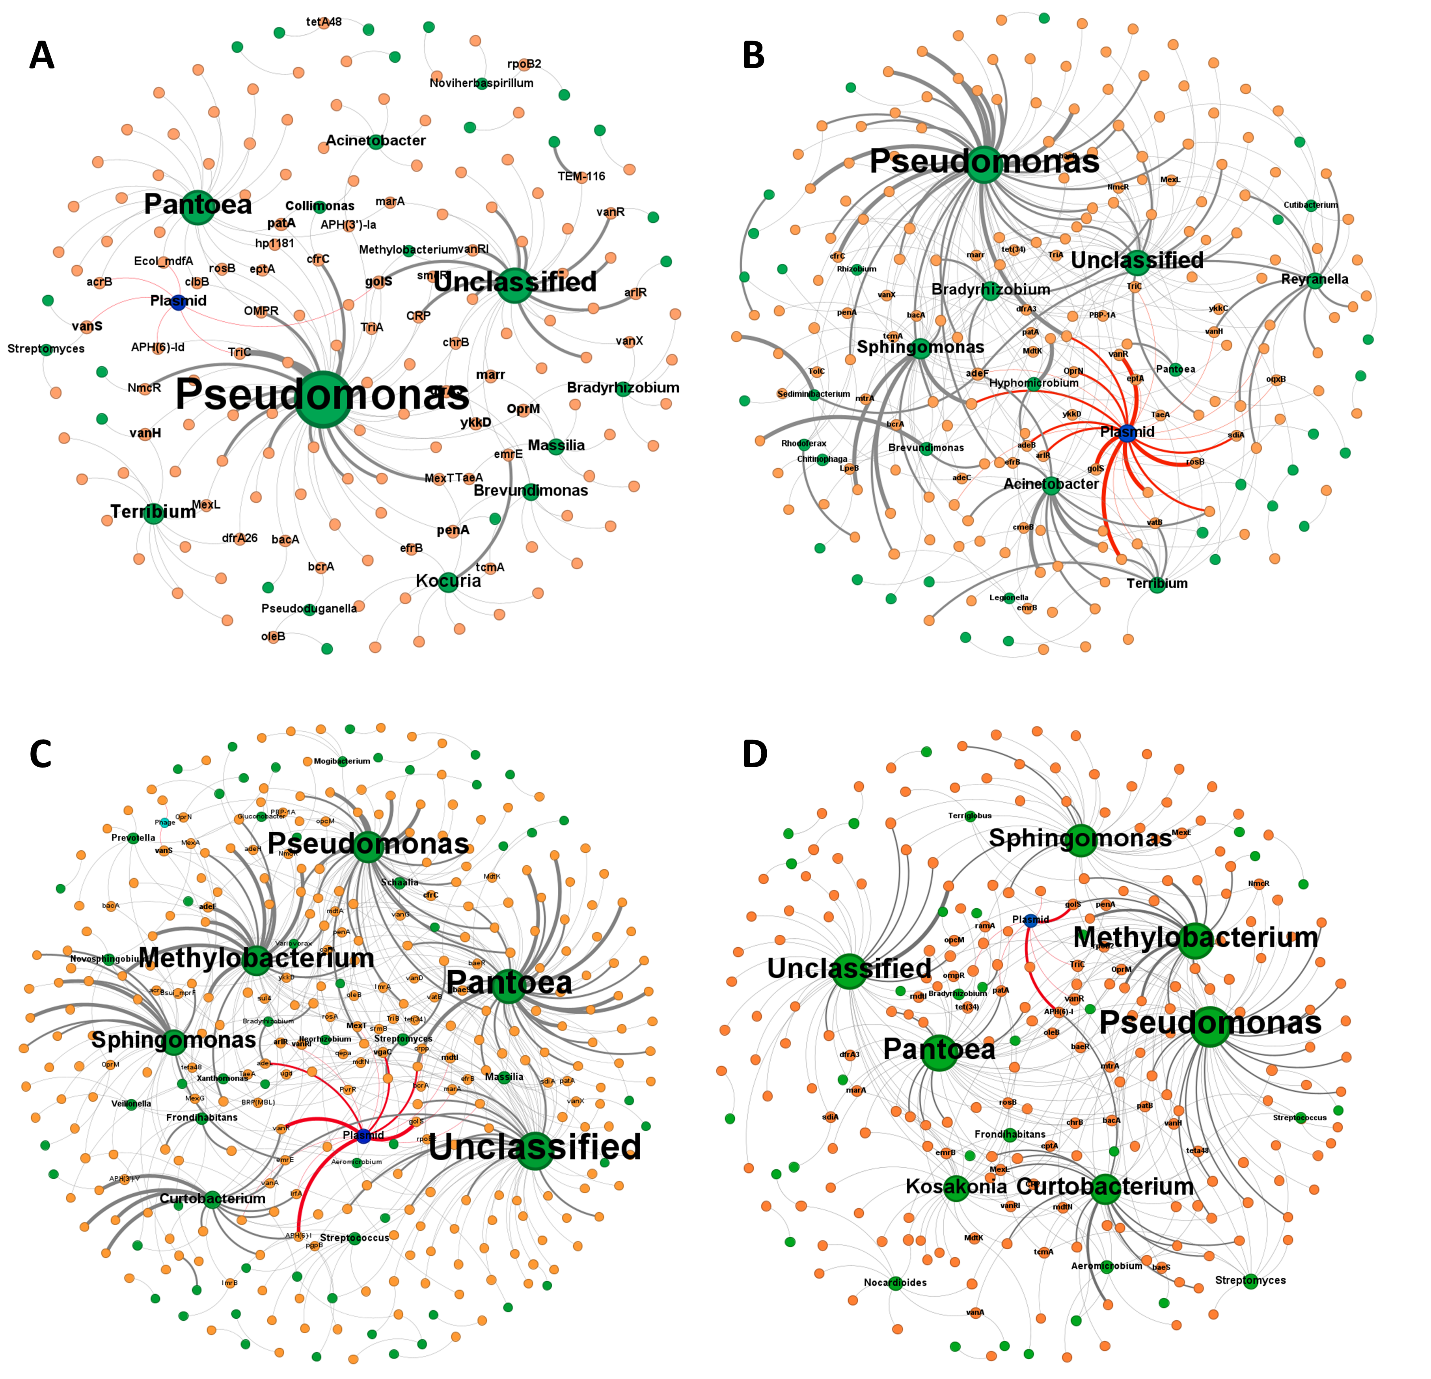


Supplementary ***Figure 2:*** Complexity and intensity of HGT proxies across the management practices. Network A, B, C, and D correspond to the following orchards: A = Israel conventional, B = Israel organic, C = USA conventional_1 and D = USA conventional_2. The nodes were colored green, purple and orange Colors to denote bacterial host, MGEs and ARGs respectively. The node size is proportional to the number of connections (degree) and edge thickness corresponds to the interaction weight. The red edges display the complexity and intensity of HGT events. In all orchards, *Pseudomonas* emerged as the dominant ARG host with extensive connectivity to multiple ARGs. Other prominent hosts i.e. *Pantoea*, *Sphingomonas*, and *Methylobacterium* also contributed substantially, although their prominence varied across the orchards. Israel - conventional exhibited the highest complexity and intensity of HGT events (indicated by red edges) followed by USA - conventional_1 and conventional_2. In contrast, Israel - organic orchards presented the lowest complexity of HGT events.
